# Supplementary material for: Three Small Molecule Entities (MPK18, MPK334 and YAK308) with Activity against Haemonchus contortus In Vitro
Source: MDPI journal article supplement (doi:10.3390/molecules26092819), 2021-05-10
Supplement: s1 [file s1]

## Supplementary File

# Three small molecule entities (MPK18, MPK334 and YAK308) with activity against *Haemonchus contortus* in vitro

Aya C. Taki<sup>1</sup>, Abdul Jabbar<sup>1</sup>, Thomas Kurz<sup>2</sup>, Beate Lungerich<sup>2</sup>, Guangxu Ma<sup>1</sup>, Joseph J. Byrne<sup>1</sup>, Marc Pflieger<sup>2</sup>, Yodita Asfaha<sup>2</sup>, Fabian Fischer<sup>2</sup>, Bill C. H. Chang<sup>1</sup>, Brad E. Sleebs<sup>1,3,4</sup>, Robin B. Gasser<sup>1,\*</sup>

<sup>1</sup> Department of Biosciences, Melbourne Veterinary School, Faculty of Veterinary and Agricultural Sciences, The University of Melbourne, Parkville, Victoria, Australia; aya.taki@unimelb.edu.au (A.C.T.); jabbara@unimelb.edu.au (A.J.); guangxu.ma@unimelb.edu.au (G.M.); bchang@yourgene.com.tw (B.C.H.C.); sleebs@wehi.edu.au (B.E.S.)

<sup>2</sup> Institute of Pharmaceutical and Medicinal Chemistry, Heinrich-Heine-University Düsseldorf, Düsseldorf, Germany; thomas.kurz@hhu.de (T.K.); beate.lungerich@hhu.de (B.L.); pflieger@hhu.de (M.P.); yodita.asfaha@uni-duesseldorf.de (Y.A.); Fabian.Fischer.14@uni-duesseldorf.de (F.F.)

<sup>3</sup> Walter and Eliza Hall Institute of Medical Research, Parkville, Victoria, Australia;

<sup>4</sup> Faculty of Medicine, Dentistry and Health Sciences, The University of Melbourne, Parkville, Victoria, Australia

\* Correspondence: robinbg@unimelb.edu.au (R.B.G.)

**Table S1.** The 245 synthetic compounds from the Kurz collection screened in this study.

| Name   | Structure                                                                           | molecular weight [g/mol] | Chemotype                                           |
|--------|-------------------------------------------------------------------------------------|--------------------------|-----------------------------------------------------|
| VWK135 | 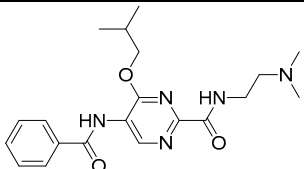   | 385,46                   | 4-alkoxypyrimidine-2-carboxamide                    |
| VWK176 |    | 377,33                   | Lithium 4-(alkylamino)pyrimidine-2-carboxylate      |
| VWK177 |   | 384,32                   | Lithium 4-(arylmethylamino)pyrimidine-2-carboxylate |
| VWK183 |  | 385,42                   | methyl 4-alkoxypyrimidine-2-carboxylate             |
| VWK189 |  | 378,39                   | methyl 4-alkoxypyrimidine-2-carboxylate             |
| VWK202 |  | 381,39                   | methyl 4-alkoxypyrimidine-2-carboxylate             |

|        |                                                                                     |        |                                                           |
|--------|-------------------------------------------------------------------------------------|--------|-----------------------------------------------------------|
| VWK205 | 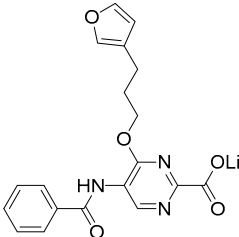   | 373,29 | Lithium 4-alkoxypyrimidine-2-carboxylate                  |
| VWK240 |    | 384,48 | 4-alkoxypyrimidine-2-carboxamide                          |
| VWK244 |    | 281,36 | 4-alkoxypyrimidine-2-carboxamide                          |
| VWK277 |   | 401,37 | Lithium 4-(arylmethylamino)pyrimidine-2-carboxylate       |
| VWK292 |  | 432,5  | 4-alkoxypyrimidine-2-carboxamide                          |
| VWK329 |  | 281,36 | 5-amino-1-alkyl-6-oxo-1,6-dihydropyrimidine-2-carboxamide |
| VWK356 |  | 328,37 | methyl 4-(alkylamino)pyrimidine-2-carboxylate             |
| VWK375 |  | 255,23 | methyl oxazolo[5,4-d]pyrimidine-5-carboxylate             |

|        |                                                                                     |        |                                                                |
|--------|-------------------------------------------------------------------------------------|--------|----------------------------------------------------------------|
| VWK382 | 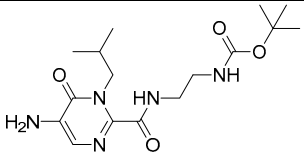   | 353,42 | 5-amino-1-alkyl-6-oxo-1,6-dihydropyrimidine-2-carboxamide      |
| VWK383 |    | 408,41 | methyl 4-(arylmethylamino)pyrimidine-2-carboxylate             |
| VWK395 |    | 400,32 | Lithium 4-(arylamino)pyrimidine-2-carboxylate                  |
| VWK397 |   | 301,26 | 3-(aryl)-3H-[1,2,3]triazolo[4,5-d]pyrimidine-5-carboxylic acid |
| VWK401 |  | 311,3  | methyl 1-alkyl-6-oxo-1,6-dihydropyrimidine-2-carboxylate       |
| VWK412 |  | 263,3  | 5-amino-1-alkyl-6-oxo-1,6-dihydropyrimidine-2-carboxamide      |
| VWK418 |  | 378,39 | methyl 4-(arylamino)pyrimidine-2-carboxylate                   |
| VWK419 |  | 363,38 | methyl 4-(arylmethylamino)pyrimidine-2-carboxylate             |

|          |                                                                                     |        |                                                          |
|----------|-------------------------------------------------------------------------------------|--------|----------------------------------------------------------|
| VWK421   |                                                                                     | 432,36 | methyl 4-(arylamino)pyrimidine-2-carboxylate             |
| VWK426   |                                                                                     | 368,42 | methyl 4-(arylmethylamino)pyrimidine-2-carboxylate       |
| VWK427-N |                                                                                     | 347,39 | methyl 1-alkyl-6-oxo-1,6-dihydropyrimidine-2-carboxylate |
| VWK427-O |                                                                                     | 347,39 | methyl 4-alkoxypyrimidine-2-carboxylate                  |
| VWK428   |                                                                                     | 444,49 | methyl 4-alkoxypyrimidine-2-carboxylate                  |
| VWK430   |                                                                                     | 387,39 | methyl 4-alkoxypyrimidine-2-carboxylate                  |
| BLK104   | 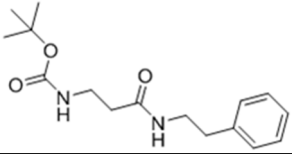 | 292,38 | 3-aminopropanamide                                       |
| BLK110   |  | 445,3  | 2-(aminooxy)- <i>N</i> -hydroxyacetamide                 |

|        |                                                                                     |        |                                 |
|--------|-------------------------------------------------------------------------------------|--------|---------------------------------|
| BLK115 | 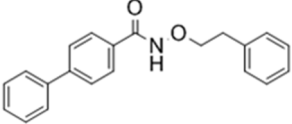   | 317,39 | N-(Alkoxy)benzamide             |
| BLK116 |    | 325,41 | N-(Aralkoxy)benzamide           |
| BLK120 |    | 314,27 | 2-(aminooxy)acetamide           |
| BLK122 |    | 364,38 | 2-(aminooxy)acetamide           |
| BLK126 |   | 374,41 | 2-(aminooxy)acetamide           |
| BLK129 |  | 455,33 | 2-(aminooxy)-N-hydroxyacetamide |
| BLK132 |  | 428,51 | 2-amino-4-phenylthiazole        |
| BLK133 |  | 412,46 | 2-amino-4-phenylthiazole        |
| BLK136 |  | 370,42 | 2-amino-4-phenylthiazole        |
| BLK137 |  | 303,38 | 2-amino-4-phenylthiazole        |

|        |                                                                                     |        |                                      |
|--------|-------------------------------------------------------------------------------------|--------|--------------------------------------|
| BLK154 | 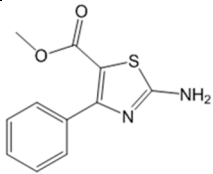   | 234,27 | 2-amino-4-phenylthiazole             |
| BLK155 |    | 398,43 | 2-amino-4-phenylthiazole             |
| BLK156 |    | 339,37 | 2-amino-4-phenylthiazole             |
| BLK163 |    | 150,18 | (Z)-N'-hydroxy-2-phenylacetimidamide |
| BLK166 |  | 345,44 | tribenzylamine                       |
| BLK170 |  | 441,45 | tribenzylamine                       |
| BLK171 |  | 423,44 | tribenzylamine                       |
| BLK172 |  | 269,34 | dibenzylmethlamine                   |

|         |                                                                                     |        |                                                        |
|---------|-------------------------------------------------------------------------------------|--------|--------------------------------------------------------|
| BLK174  | 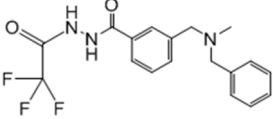   | 365,36 | <i>N</i> -benzyl- <i>N</i> -methyl-1-phenylmethanamine |
| BLK175  |    | 347,34 | <i>N</i> -benzyl- <i>N</i> -methyl-1-phenylmethanamine |
| BLK177  |    | 300,31 | 2-(aminooxy)- <i>N</i> -hydroxyacetamide               |
| BLK178  |    | 314,3  | 2-(aminooxy)- <i>N</i> -hydroxyacetamide               |
| BLK183  |   | 271,3  | 2-(aminooxy)-2-phenylacetic acid                       |
| BLK188  |                                                                                     | 347,37 | 2-(aminooxy)-2-phenylacetic acid                       |
| BLK189  |  | 375,4  | 2-(aminooxy)-2-phenylacetic acid                       |
| BLK191  |  | 362,4  | 2-(aminooxy)- <i>N</i> -hydroxy-2-phenylacetamide      |
| BLK194  |  | 299,3  | 2-(aminooxy)-2-phenylacetic acid                       |
| BLK195  |  | 286,3  | 2-(aminooxy)- <i>N</i> -hydroxy-2-phenylacetamide      |
| MLKQnP1 |  | 231,3  | Quinoline                                              |



|             |                                                                                     |        |               |
|-------------|-------------------------------------------------------------------------------------|--------|---------------|
| MLKQ9       | 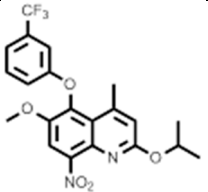   | 436,39 | Quinoline     |
| MLKQiP2     |    | 265,74 | Quinoline     |
| MLKQE3      |    | 296,71 | Quinoline     |
| MLKQnP2     |    | 265,74 | Quinoline     |
| MLKQ5       |    | 422,36 | Quinoline     |
| MLKQ6       |   | 392,38 | Quinoline     |
| MLKd1a      |  | 595,58 | Quinoline     |
| MLKh1a      |  | 623,63 | Quinoline     |
| TKK107      |                                                                                     | 397.54 | hydrazonamide |
| TKK108      |                                                                                     | 480.7  | hydrazonamide |
| TKK119      |                                                                                     | 325.46 | hydrazonamide |
| N1-BA-AAH   |                                                                                     | 283,38 | hydrazonamide |
| N1-4OMe-AAH |                                                                                     | 347,42 | hydrazonamide |

|                 |  |        |               |
|-----------------|--|--------|---------------|
| N1-4diMeN-AAH   |  | 360,46 | hydrazonamide |
| N1-ICA-AAH      |  | 356,43 | hydrazonamide |
| N1-F2CA-AAH     |  | 307,35 | hydrazonamide |
| N1-4triFMe-AAH  |  | 385.39 | hydrazonamide |
| N1-34diCl-AAH   |  | 386.28 | hydrazonamide |
| N1-4diEtNMe-AAH |  | 402.54 | hydrazonamide |
| N1-PA-AAH       |  | 297.40 | hydrazonamide |
| N2-4triFMe-AAH  |  | 385.39 | hydrazonamide |
| N2-4Me-AAH      |  | 331.42 | hydrazonamide |
| N2-24diF-AAH    |  | 353.37 | hydrazonamide |
| N2-4OMe-AAH     |  | 347.42 | hydrazonamide |
| N2-P3CA-AAH     |  | 318.38 | hydrazonamide |
| N2-34diCl-AAH   |  | 386.28 | hydrazonamide |
| N2-3OEt4OH-AAH  |  | 377.44 | hydrazonamide |
| N2-4OBn-AAH     |  | 423,52 | hydrazonamide |
| N2a-AAH         |  | 303,37 | hydrazonamide |
| P9-5NA-AAH      |  | 417,60 | hydrazonamide |
| P9-4F-AAH       |  | 385,44 | hydrazonamide |
| P9-Cyh-AAH      |  | 373,50 | hydrazonamide |
| BLK003          |  | 373,50 | hydrazonamide |
| BLK001          |  | 468,60 | hydrazonamide |
| BLK004          |  | 482,58 | hydrazonamide |
| BLK010          |  | 440,55 | hydrazonamide |

|         |                                                                                     |        |                                 |
|---------|-------------------------------------------------------------------------------------|--------|---------------------------------|
| BLK019  | 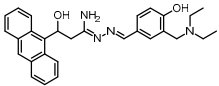   | 468,60 | hydrazonamide                   |
| BLK021  |    | 444,54 | hydrazonamide                   |
| BLK023  |    | 452,60 | hydrazonamide                   |
| BLK080  |    | 347,46 | hydrazonamide                   |
| BLK081  |    | 349,43 | hydrazonamide                   |
| BLK082  |    | 331,42 | hydrazonamide                   |
| BLK084  |    | 224,26 | arylalcohol                     |
| BLK086  |   | 362,41 | hydrazonamide                   |
| ABK-377 |  | 460,41 | 2-(aminooxy)-N-hydroxyacetamide |
| ABK-394 |  | 422,51 | 2-(aminooxy)-N-hydroxyacetamide |
| ABK-403 |  | 376,41 | 2-(aminooxy)-N-hydroxyacetamide |
| ABK-421 |  | 390,44 | 2-(aminooxy)-N-hydroxyacetamide |

|         |                                                                                     |        |                                           |
|---------|-------------------------------------------------------------------------------------|--------|-------------------------------------------|
| ABK-422 | 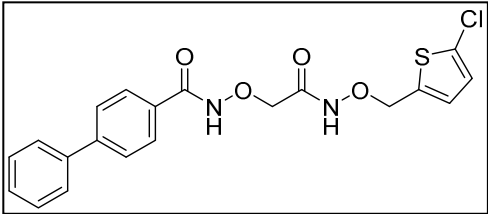   | 416,88 | 2-(aminooxy)- <i>N</i> -hydroxyacetamide  |
| MPK142  |    | 357.41 | (2-(4-((aminooxy)methyl)benzamido)phenyl) |
| MPK18   |    | 267.33 | 3-(p-tolyl)acrylamide                     |
| MPK96   |   | 487.51 | (2-(4-((aminooxy)methyl)benzamido)phenyl) |
| MPK67   |  | 426.52 | Phenylalanine derivative                  |
| MPK86   |  | 284.28 | 2-aminopyrimidine                         |
| MPK187  |  | 419.48 | Hydroxamic acid                           |

|        |                                                                                     |        |                           |
|--------|-------------------------------------------------------------------------------------|--------|---------------------------|
| MPK192 | 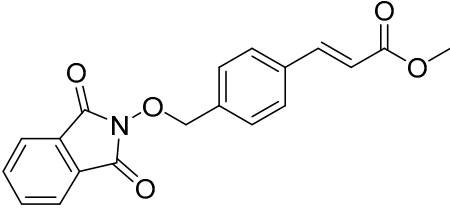   | 337.33 | 3-(p-tolyl)acrylate       |
| MPK193 |    | 207.23 | 3-(p-tolyl)acrylate       |
| MPK215 |    | 354.37 | Methyl benzoate           |
| MPK264 |   | 371.44 | Hydroxamic acid           |
| MPK265 |  | 343.38 | Hydroxamic acid           |
| MPK318 |  | 224.26 | chalcone                  |
| MPK317 |  | 238.24 | 4 <i>H</i> -chromen-4-one |

|        |                                                                                     |        |                           |
|--------|-------------------------------------------------------------------------------------|--------|---------------------------|
| MPK329 | 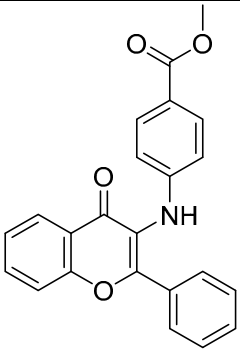   | 371.39 | 4 <i>H</i> -chromen-4-one |
| MPK324 |    | 386.45 | Hydroxamic acid           |
| MPK328 |   | 370.30 | 4 <i>H</i> -chromen-4-one |
| MPK334 |  | 303.16 | Chalcone                  |
| MPK380 |  | 317.14 | 4 <i>H</i> -chromen-4-one |
| MPK377 |  | 477.52 | 4 <i>H</i> -chromen-4-one |

|        |                                                                                     |        |                           |
|--------|-------------------------------------------------------------------------------------|--------|---------------------------|
| MPK375 | 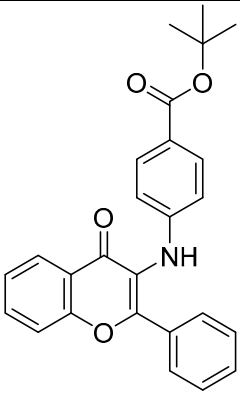   | 413.47 | 4 <i>H</i> -chromen-4-one |
| MPK391 |    | 239.23 | 4 <i>H</i> -chromen-4-one |
| MPK396 |   | 372.38 | 4 <i>H</i> -chromen-4-one |
| MPK406 |  | 373.37 | 4 <i>H</i> -chromen-4-one |
| MPK409 |  | 363.37 | Hydroxamic acid           |
| MPK414 |  | 395.43 | Hydroxamic acid           |

|        |                                                                                     |        |                           |
|--------|-------------------------------------------------------------------------------------|--------|---------------------------|
| MPK415 | 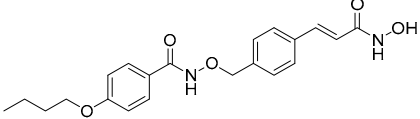   | 384.43 | Hydroxamic acid           |
| MPK416 |    | 402.40 | Hydroxamic acid           |
| MPK421 |    | 337.38 | benzoate                  |
| MPK423 |    | 272.68 | 4 <i>H</i> -chromen-4-one |
| MPK428 |  | 404.74 | 4 <i>H</i> -chromen-4-one |
| MPK439 |  | 282.68 | Quinoline                 |
| MPK460 |  | 362.39 | Hydroxamic acid           |
| MPK461 |  | 363.37 | Hydroxamic acid           |



|        |                                                                                     |        |                           |
|--------|-------------------------------------------------------------------------------------|--------|---------------------------|
| MPK472 | 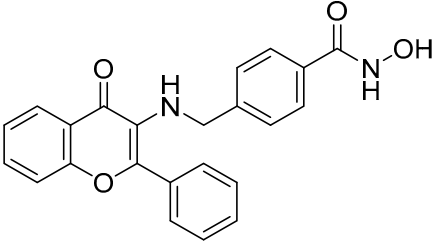   | 386.41 | Hydroxamic acid           |
| MPK481 |    | 317.14 | 4 <i>H</i> -chromen-4-one |
| MPK490 |    | 449.19 | 4 <i>H</i> -chromen-4-one |
| MPK508 |  | 387.39 | Hydroxamic acid           |
| MPK509 |  | 388.38 | Hydroxamic acid           |
| MPK511 |  | 281.31 | Hydroxamic acid           |

|        |                                                                                     |        |                                      |
|--------|-------------------------------------------------------------------------------------|--------|--------------------------------------|
| MPK522 | 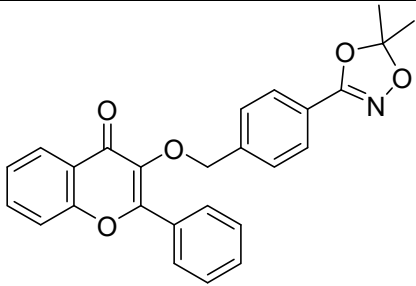   | 427.46 | 4 <i>H</i> -chromen-4-one            |
| MPK525 |    | 218.26 | Quinoline                            |
| MPK526 |    | 336.35 | Dioxazole                            |
| MPK541 |   | 406.44 | Hydroxamic acid                      |
| MPK542 |  | 494.59 | <i>O</i> - protected hydroxamic acid |
| MPK543 |  | 426.47 | 4 <i>H</i> -chromen-4-one            |
| MPK544 |  | 404.47 | Hydroxamic acid                      |

|        |                                                                                     |        |                           |
|--------|-------------------------------------------------------------------------------------|--------|---------------------------|
| MPK545 | 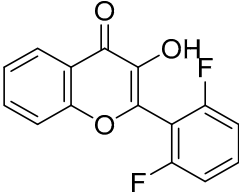   | 274.22 | 4 <i>H</i> -chromen-4-one |
| MPK546 |    | 266.30 | 4 <i>H</i> -chromen-4-one |
| MPK557 |    | 398.35 | 4 <i>H</i> -chromen-4-one |
| MPK558 |   | 406.28 | 4 <i>H</i> -chromen-4-one |
| MPK563 |  | 446.40 | 4 <i>H</i> -chromen-4-one |
| MPK567 |  | 384.48 | benzoate                  |
| MPK576 |  | 324.38 | Hydroxamic acid           |

|         |                                                                                     |        |                                      |
|---------|-------------------------------------------------------------------------------------|--------|--------------------------------------|
| LAK4    | 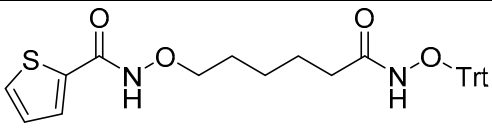   | 514,64 | <i>O</i> - protected hydroxamic acid |
| LAK70   |    | 520,58 | <i>O</i> - protected hydroxamic acid |
| LAK75   |    | 380,44 | 6-(aminooxy)hexanoic acid            |
| LAK80   |    | 548,64 | <i>O</i> - protected hydroxamic acid |
| LAK102  |   | 475,54 | 4-methylbenzamide                    |
| LAK104  |  | 490,56 | 4-methylbenzamide                    |
| YAK 288 |  | 423.44 | Trifluoromethyloxadiazole            |
| YAK308  |  | 340.40 | 2-amino-4-phenylthiazole             |
| YAK 312 |  | 340.36 | Hydroxamic acid                      |
| YAK325  |  | 437.42 | Trifluoromethyloxadiazole            |

|         |                                                                                     |        |                           |
|---------|-------------------------------------------------------------------------------------|--------|---------------------------|
| YAK320  | 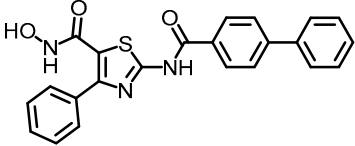   | 415.47 | Hydroxamic acid           |
| YAK 328 |    | 347.30 | Trifluoromethyloxadiazole |
| YAK398  |    | 368.70 | Trifluoromethyloxadiazole |
| YSKK82  |    | 327.38 | Hydroxamic acid           |
| YAK 330 |   | 284.32 | Hydroxamic acid           |
| YSKK43  |  | 270.29 | Hydroxamic acid           |
| YSKK78  |  | 344.37 | Hydroxamic acid           |
| YSKK42  |  | 284.32 | Hydroxamic acid           |
| YAK375  |  | 416.38 | Trifluoromethyloxadiazole |

|         |                                                                                                 |        |                               |
|---------|-------------------------------------------------------------------------------------------------|--------|-------------------------------|
| YAK 383 | 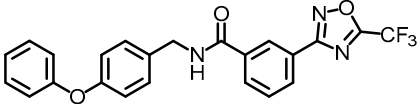               | 439.39 | Trifluoromethyloxadiazole     |
| YAK 378 |                | 423.40 | Trifluoromethyloxadiazole     |
| YAK 384 |                | 411.38 | Trifluoromethyloxadiazole     |
| YAK 376 |                | 423.40 | Trifluoromethyloxadiazole     |
| YAK379  |              | 377.32 | Trifluoromethyloxadiazole     |
| YAK382  |              | 389.38 | Trifluoromethyloxadiazole     |
| YAK422  |              | 304.27 | Trifluoromethyloxadiazole     |
| YAK431  | <br>[286.39] | 286.39 | 2-thio-2-phenylacetic acetate |



|        |                                                                                     |        |                           |
|--------|-------------------------------------------------------------------------------------|--------|---------------------------|
| FFK19  | 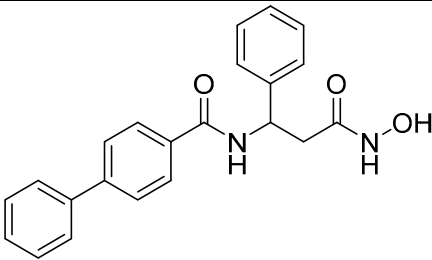   | 360.41 | Hydroxamic acid           |
| FFK22  |    | 344.37 | Hydroxamic acid           |
| FFK23  |   | 353.20 | Hydroxamic acid           |
| FFK33  |  | 309.38 | Hydroxamic acid           |
| YAK468 |  | 335.43 | Hydroxamic acid           |
| YAK448 |  | 243.26 | Hydroxamic acid           |
| YAK439 |  | 336.34 | Trifluoromethyloxadiazole |



|        |                                                                                     |        |                               |
|--------|-------------------------------------------------------------------------------------|--------|-------------------------------|
| YAK427 | 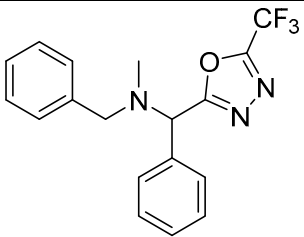   | 347.34 | Trifluoromethyloxadiazole     |
| MPK648 |    | 202.25 | Flavone                       |
| MPK664 |    | 228.29 | Flavone                       |
| MPK718 |   | 235.24 | Chromeno-indol-one            |
| MPK674 |  | 267.24 | Flavone                       |
| MPK690 |  | 246.31 | 2'-Hydroxy-acetophenone-ester |
| MPK691 |  | 220.27 | 2'-Hydroxy-acetophenone-ester |
| MPK694 |  | 285.26 | 2'-Hydroxy-acetophenone-ester |

|        |                                                                                                                 |        |                           |
|--------|-----------------------------------------------------------------------------------------------------------------|--------|---------------------------|
| MPK701 | 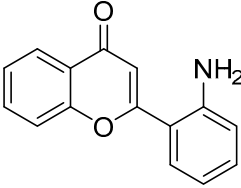                               | 237.26 | Flavone                   |
| MPK733 |                                | 191.23 | Chalcone                  |
| MPK741 |                                | 146.15 | Flavone                   |
| MPK611 |                                | 215.05 | Phenolester               |
| MPK610 |                              | 317.14 | Flavonol                  |
| MPK630 |                              | 314.34 | Flavonol                  |
| MPK746 | <br>Molecular Weight: 162,14 | 162.14 | Flavonol                  |
| FFK15  | <br>Molecular Weight: 283,33 | 283.33 | $\beta$ -amino acid ester |

|        |                                                                                                                     |        |                            |
|--------|---------------------------------------------------------------------------------------------------------------------|--------|----------------------------|
| FFK17  | 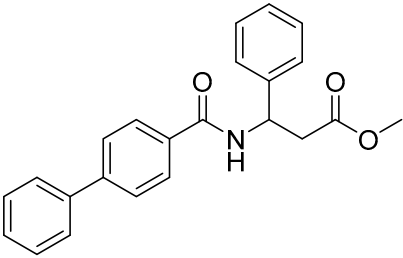 <p>Molecular Weight: 359,43</p>   | 359.43 | $\beta$ -amino acid ester  |
| FFK14  |  <p>Molecular Weight: 179,22</p>   | 179.22 | $\beta$ -amino acid ester  |
| FFK21  |  <p>Molecular Weight: 352,21</p>  | 352.21 | $\beta$ -amino acid ester  |
| FFK20  |  <p>Molecular Weight: 343,38</p> | 343.38 | $\beta$ -amino acid ester  |
| YSKK53 |  <p>[343.38]</p>                 | 343.38 | $\alpha$ -amino acid ester |
| YSKK54 |  <p>[329.35]</p>                 | 329.35 | $\alpha$ -amino acid ester |
| YSKK55 |  <p>[343.38]</p>                 | 343.38 | $\alpha$ -amino acid ester |

|         |                                                                                                                     |        |                            |
|---------|---------------------------------------------------------------------------------------------------------------------|--------|----------------------------|
| YSKK 61 | 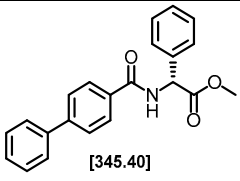 <p>[345.40]</p>                   | 345.40 | $\alpha$ -amino acid ester |
| YSKK60  |  <p>[359.43]</p>                   | 359.43 | $\alpha$ -amino acid ester |
| YAK318  |  <p>[269.30]</p>                   | 269.30 | $\alpha$ -amino acid ester |
| YAK494  |  <p>Molecular Weight: 269,30</p>  | 269.30 | $\alpha$ -amino acid ester |
| YAK322  |  <p>[283.33]</p>                 | 283.33 | $\alpha$ -amino acid ester |
| YAK493  |  <p>[283.33]</p>                 | 283.33 | $\alpha$ -amino acid ester |
| YAK498  |  <p>[359.43]</p>                 | 359.43 | $\alpha$ -amino acid ester |
| BLK139  |  <p>Molecular Weight: 368,41</p> | 368.41 | Thiazole derivative        |

|        |                                                                                                                                               |        |                     |
|--------|-----------------------------------------------------------------------------------------------------------------------------------------------|--------|---------------------|
| BLK157 | 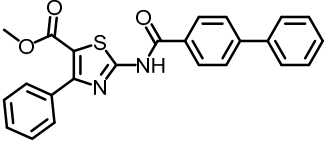 <p data-bbox="496 347 715 371">Molecular Weight: 414,48</p> | 414.48 | Thiazole derivative |
|--------|-----------------------------------------------------------------------------------------------------------------------------------------------|--------|---------------------|
